# Supplementary material for: Tanshinone IIA confers protection against myocardial ischemia/reperfusion injury by inhibiting ferroptosis and apoptosis via VDAC1
Source: PubMed Central journal article supplement — Int J Mol Med. 2023 Oct 3;52(5):109. doi: 10.3892/ijmm.2023.5312 (PMC10558218; doi:10.3892/ijmm.2023.5312), 2023-10-03

Figure S1. Western blotting of target protein post-transduction. (A) Expression of (B) VDAC1 was detected by western blot in H9c2 cells after pAd/VDAC1 or pAd/NC pretreatment. Data are expressed as the mean  $\pm$  SD (n=3). \*\*\*P<0.05. VDAC1, Voltage-dependent anion channel 1; NC, negative control; ns, not significant.

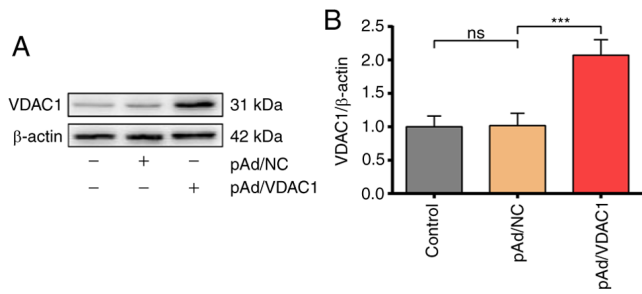

Supplement: Supplementary_Data.pdf [file Supplementary_Data.pdf]
